# Supplementary material for: Quality and freshness of human bone marrow-derived mesenchymal stem cells decrease over time after trypsinization and storage in phosphate-buffered saline
Source: PubMed Central journal article supplement (PMC5430841; doi:10.1038/s41598-017-01315-0), 2017-04-24
Supplement: 41598_2017_1315_MOESM1_ESM.pdf [file 41598_2017_1315_MOESM1_ESM.pdf]

## Supporting Information

### Quality and freshness of human bone marrow-derived mesenchymal stem cells decrease over time after trypsinization and storage in phosphate-buffered saline

Tae Hwan Shin<sup>1,3#</sup>, Seungah Lee<sup>2#</sup>, Ki Ryung Choi<sup>3,4</sup>, Da Yeon Lee<sup>3</sup>, Yongman Kim<sup>4</sup>, Man Jeong Paik<sup>5</sup>, Chan Seo<sup>5</sup>, Seok Kang<sup>6</sup>, Moon Suk Jin<sup>7</sup>, Tae Hyeon Yoo<sup>1</sup>, Seong Ho Kang<sup>2\*</sup>, Gwang Lee<sup>3\*</sup>

<sup>1</sup>*Department of Molecular Science and Technology, Ajou University, Suwon, Republic of Korea*

<sup>2</sup>*Department of Applied Chemistry and Institute of Natural Sciences, Kyung Hee University, Yongin-si, Republic of Korea*

<sup>3</sup>*Department of Physiology and Department of Biomedical Sciences, Ajou University School of Medicine, Suwon, Republic of Korea*

<sup>4</sup>*Pharmicell Co., Ltd., Sunnam, Republic of Korea*

<sup>5</sup>*College of Pharmacy, Sunchon National University, Suncheon, Republic of Korea*

<sup>6</sup>*Hanyang University School of Medicine, Seoul, Republic of Korea*

<sup>7</sup>*Biological Sciences, Ajou University, Suwon, Republic of Korea*

#: These authors contributed equally to this work.

\*Co-corresponding author: Seong Ho Kang, Professor Department of Applied Chemistry and Institute of Natural Sciences, Kyung Hee University, Yongin-si, Gyeonggi-do 446-701 Republic of Korea. Tel : +82 31 201 3349, email : shkang@khu.ac.kr

\*Corresponding author: Gwang Lee, Professor, Department of Physiology, Ajou University School of Medicine, 164, World cup-ro, Yeongtong-gu, Suwon 16499, Republic of Korea. Tel : +82-31-219-4554, fax: +82-31-219-5049, e-mail : glee@ajou.ac.kr

## **Materials and Methods**

### **Total RNA isolation**

Total RNA was isolated from hBM-MSCs using RNAzol B (Tel-Test, Friendswood, TX, USA). Briefly,  $2 \times 10^6$  cells were harvested in RNAzol B solution, followed by addition of chloroform and incubation for 5 min on ice. Cells were then treated with isopropyl alcohol to precipitate total RNA. Pellets were washed in 70% ethanol followed by air drying, and total RNA was dissolved with RNase-free water. RNA purity was determined with optical density values of 1.8–2.0 at wavelength ratio of 260/230 and 260/280, using spectrophotometry (Eppendorf, Hamburg, Germany).

### **Evaluation of intracellular ROS levels**

Intracellular ROS was evaluated by DCFH-DA staining (Cell Biolabs, San Diego, CA, USA) according to the manufacturer's protocol. Briefly, cells were resuspended in dye solution (10  $\mu$ M DCFH-DA in PBS) and incubated in 37°C/5% CO<sub>2</sub> for 1 h. Samples were washed twice with PBS, and fluorescence was measured with a Gemini EM fluorescence microplate reader (Molecular Devices, Sunnyvale, CA, USA) at 480 nm excitation/530 nm emission.

### **Semi-quantitative RT-PCR**

ROS-related gene expression and adipocyte specific marker gene expression were detected by semi-quantitative RT-PCR using gene-specific primer pairs (Supplementary Table 4, 7). To prepare cDNA, total RNA (1  $\mu$ g) was reverse transcribed using the Power cDNA Synthesis Kit (Intron, Sungnam, Korea) and oligo dT primers on a Thermocycler T3000 PCR system

(Whatman Biometra, Gottingen, Germany). PCR reactions were carried out using 100 ng cDNA, 5 pmoles of each primer, and Biomix (Biolines, Taunton, MA, USA). Each reaction was subjected to melting point analysis to confirm that a single product had been amplified. Products were separated on 2% agarose gel and visualized by ethidium bromide staining.

### **Evaluation of autophagy induction**

Autophagic vacuoles were stained to evaluate autophagy induction using monodansylcadaverine (MDC) as manufacturer's instruction (Cayman Chemical, MI, USA). Briefly, after 6 and 12 h PBS-incubation, hBM-MSCs were plated at a density of  $5 \times 10^4$  cells/well in a 96 well plate and centrifuged at 400 g for 5 min at room temperature. The cells were then washed with cell-based assay buffer (Cayman Chemical, MI, USA), incubated with 100  $\mu$ l of Cell-Based MDC solution (Cayman Chemical, MI, USA) for 10 min at 37°C, and examined under Axio 200M Zeiss fluorescent microscope (Carl Zeiss Inc., Göttingen, Germany). The cells were transferred to 96-well black plate and were measured for fluorescence microplate reader at 335/512 nm (excitation/emission).

### **Evaluation of lipid peroxidation**

Peroxidized unsaturated lipids were quantified using a kit (Cayman Chemical, Ann Arbor, MI, USA) according to the manufacturer's instructions. Briefly, cells were detached from the culture dish and incubated in PBS for 6 or 12 h in the presence or absence of 1 mM NAC. After two washes with PBS, the cells were transferred to glass test tubes. Lipids were extracted with methanol saturated with crystalline solid and ice-cold chloroform. After five rounds of centrifugation ( $1500 \times g$  at 0°C), the bottom chloroform layer was collected and mixed at a 9:1

ratio with a solution containing 2.25 mM ferrous sulfate, 0.1 M hydrochloric acid, and 1.5% ammonium thiocyanate in methanol, followed by incubation at room temperature for 5 min. Ferric ions were produced in the reaction and peroxidized unsaturated lipids were detected using thiocyanate as a chromogen. Absorbance at 500 nm was measured on a microplate reader (Molecular Devices) in a quartz cuvette.

### **Evaluation of differentiation capacity**

hBM-MSCs were plated at a density of 5,000 cells/cm<sup>2</sup> after PBS-storage for 6 or 12 h in the presence or absence of 1 mM NAC, and then cultured at 37 °C in humidified atmosphere of 5% CO<sub>2</sub> in condition medium of adipogenesis (StemPro Adipogenesis Differentiation Kit, Invitrogen, CA, USA) or osteogenesis (StemPro Osteogenesis Differentiation Kit, Invitrogen, CA, USA) induction for 2 weeks, respectively. To maintain the cells in a differentiation, condition medium was changed every 72 h.

To assess osteogenic differentiation of hBM-MSCs, Alizarin Red S staining was performed after 2 weeks of differentiation. Briefly, cells were fixed with Cytofix buffer (BD, San Jose, CA, USA), and then rinsed with distilled water and stained with 2% Alizarin Red S (Sigma-Aldrich) in the dark for 45 min. Cells were washed 4-times with distilled water and PBS was added. Images were taken Axio 200FL Zeiss microscope equipped with AxioCam ICc5 (Carl Zeiss Inc., Göttingen, Germany). Alkaline phosphatase activity of osteogenic differentiated cell was evaluated after 2 weeks of culture in osteogenic differentiation media. Alkaline phosphatase activity assay was performed using pNPP-based alkaline phosphatase Staining Kit (Sigma-Aldrich). Absorbance at 405 nm was measured on a microplate reader (Molecular Devices).

To evaluate adipogenic differentiation of hBM-MSCs, Oil Red O staining was performed after 2 weeks of differentiation. Briefly, cells were fixed with Cytofix buffer (BD, San Jose, CA, USA), and then rinsed with distilled water and incubated in 60% isopropanol for 5 min. Cells were stained with 0.18% Oil Red O dissolved in 60% isopropanol for 20 min, and then washed 4-times with distilled water. Images were taken Axio 200FL Zeiss microscope equipped with AxioCam ICc5 (Carl Zeiss Inc., Göttingen, Germany).

**Supplementary Table 1.** Ingenuity Pathway Analysis-based profiles of ROS generation-related genes in hBM-  
MSCs cells over time

| Entrez gene name                                                    | Symbol          | Affymetrix ID | Location            | Signal<br>(fold change) <sup>a</sup> |        |
|---------------------------------------------------------------------|-----------------|---------------|---------------------|--------------------------------------|--------|
|                                                                     |                 |               |                     | 6 h                                  | 12 h   |
| ADAM metallopeptidase with thrombospondin type 1 motif 2            | <i>ADAMTS2</i>  | 214454_at     | Extracellular space | -1.08                                | -1.17  |
| v-Akt murine thymoma viral oncogene homolog 2                       | <i>AKT2</i>     | 203809_s_at   | Cytoplasm           | -5.79                                | -24.49 |
| v-Akt murine thymoma viral oncogene homolog 3                       | <i>AKT3</i>     | 219393_s_at   | Cytoplasm           | -2.38                                | -2.39  |
| Adaptor-related protein complex 4 mu 1 subunit                      | <i>AP4M1</i>    | 209837_at     | Cytoplasm           | -1.28                                | -1.18  |
| ATPase H <sup>+</sup> transporting V1 subunit B1                    | <i>ATP6V1B1</i> | 1554847_at    | Cytoplasm           | -1.72                                | 1.53   |
| Cytochrome c oxidase subunit 8A                                     | <i>COX8A</i>    | 201119_s_at   | Cytoplasm           | -1.05                                | -1.06  |
| C-X-C motif chemokine ligand 2                                      | <i>CXCL2</i>    | 230101_at     | Extracellular space | -5.50                                | 2.98   |
| Cytochrome P450 family 4 subfamily A member 11                      | <i>CYP4A11</i>  | 211231_x_at   | Cytoplasm           | -4.69                                | -6.86  |
| Epidermal growth factor receptor pathway substrate 8                | <i>EPS8</i>     | 202609_at     | Plasma membrane     | 1.01                                 | 1.07   |
| Forkhead box O3                                                     | <i>FOXO3</i>    | 231548_at     | Nucleus             | 3.55                                 | 1.44   |
| KH domain-containing, RNA-binding, signal transduction-associated 1 | <i>KHDRBS1</i>  | 200040_at     | Nucleus             | 1.07                                 | 1.20   |
| Ladinin 1                                                           | <i>LADI</i>     | 216641_s_at   | Extracellular space | 3.78                                 | -2.69  |
| Lysosomal-associated membrane protein 2                             | <i>LAMP2</i>    | 226671_at     | Plasma membrane     | -1.35                                | 1.44   |
| Lectin, galactoside-binding soluble 1                               | <i>LGALS1</i>   | 216500_at     | Extracellular space | 1.12                                 | -1.40  |
| LYN proto-oncogene, Src family tyrosine kinase                      | <i>LYN</i>      | 202625_at     | Cytoplasm           | -1.54                                | -2.42  |
| Mitogen-activated protein kinase kinase kinase 2                    | <i>MAP3K2</i>   | 221695_s_at   | Cytoplasm           | -1.44                                | -1.80  |
| Mitogen-activated protein kinase 7                                  | <i>MAPK7</i>    | 35617_at      | Cytoplasm           | -1.21                                | 1.11   |
| Protein inhibitor of activated STAT 4                               | <i>PIAS4</i>    | 212879_x_at   | Nucleus             | -4.28                                | -4.52  |
| Phosphoinositide-3-kinase regulatory subunit 1                      | <i>PIK3R1</i>   | 212239_at     | Cytoplasm           | -1.02                                | -1.24  |
| Phosphoinositide-3-kinase regulatory subunit 5                      | <i>PIK3R5</i>   | 227553_at     | Cytoplasm           | -2.65                                | -8.48  |
| Phosphatase and tensin homolog                                      | <i>PTEN</i>     | 242622_x_at   | Cytoplasm           | 3.91                                 | 49.96  |
| Ras-related GTP binding B                                           | <i>RRAGB</i>    | 205540_s_at   | Cytoplasm           | 1.16                                 | 1.33   |
| Succinate dehydrogenase complex iron sulfur subunit B               | <i>SDHB</i>     | 214166_at     | Cytoplasm           | 2.47                                 | 1.35   |
| SH2 domain containing 2A                                            | <i>SH2D2A</i>   | 207351_s_at   | Cytoplasm           | -2.67                                | 1.40   |

<sup>a</sup>Normalized ratio of fold change of signal at 6 and 12 h of storage to corresponding signal of control group.

**Supplementary Table 2.** Amino acid composition of hBM-MSCs stored in PBS

| Amino acid                  | Control (n = 3) | PBS-incubated group (n = 3) |      |                | Normalized value <sup>a</sup> |      |
|-----------------------------|-----------------|-----------------------------|------|----------------|-------------------------------|------|
|                             |                 | Signal <sup>b</sup>         |      |                | 6 h                           | 12 h |
|                             |                 | 6 h                         | 12 h | <i>p</i> value |                               |      |
| Alanine                     | 3.3             | 4.7                         | 3.9  | 0.1259         | 1.4                           | 1.2  |
| Glycine                     | 3.2             | 5.4                         | 4.7  | 0.0026         | 1.7                           | 1.5  |
| Valine                      | 3.0             | 3.2                         | 2.8  | 0.0165         | 1.1                           | 1.0  |
| Leucine                     | 4.9             | 5.4                         | 4.9  | 0.0752         | 1.1                           | 1.0  |
| Isoleucine                  | 5.2             | 5.4                         | 4.7  | 0.0767         | 1.0                           | 0.9  |
| Threonine                   | 6.7             | 3.0                         | 3.7  | 0.0857         | 0.4                           | 0.6  |
| Serine                      | 11.2            | 11.7                        | 14.5 | 0.0410         | 1.1                           | 1.3  |
| Proline                     | 3.4             | 4.4                         | 3.6  | 0.0450         | 1.3                           | 1.1  |
| $\gamma$ -Aminobutyric acid | 0.0             | 0.1                         | 0.1  | 0.0019         | 2.4                           | 3.8  |
| Pyroglutamic acid           | 36.8            | 30.4                        | 14.4 | 0.0014         | 0.8                           | 0.4  |
| Phenylalanine               | 2.0             | 2.4                         | 2.3  | 0.2681         | 1.2                           | 1.1  |
| Aspartic acid               | 1.2             | 0.9                         | 0.8  | 0.1338         | 0.8                           | 0.7  |
| Glutamic acid               | 3.6             | 3.1                         | 4.9  | 0.0023         | 0.9                           | 1.4  |
| Asparagine                  | 0.5             | 0.6                         | 0.7  | 0.0648         | 1.1                           | 1.3  |
| Glutamine                   | 1.8             | 1.1                         | 1.5  | 0.0196         | 0.6                           | 0.8  |
| Lysine                      | 0.5             | 0.8                         | 2.1  | 0.0007         | 1.7                           | 4.6  |
| Tyrosine                    | 12.8            | 17.4                        | 30.3 | 0.0002         | 1.4                           | 2.4  |

<sup>a</sup>Compared to control after 6 or 12 h of storage.

<sup>b</sup>Amino acid signal intensity.

**Supplementary Table 3.** Ingenuity Pathway Analysis-based profiles of lipid peroxidation-related genes in hBM-MSCs cells overtime

| Entrez Gene Name                                         | Symbol         | Affymetrix ID | Location            | Signal (fold change) <sup>a</sup> |        |
|----------------------------------------------------------|----------------|---------------|---------------------|-----------------------------------|--------|
|                                                          |                |               |                     | 6 h                               | 12 h   |
| acetylcholinesterase (Yt blood group)                    | <i>ACHE</i>    | 210332_at     | Plasma Membrane     | -5.09                             | -8.53  |
| alpha-1-microglobulin/bikunin precursor                  | <i>AMBP</i>    | 214425_at     | Extracellular Space | -4.55                             | -10.51 |
| apolipoprotein B                                         | <i>APOB</i>    | 223579_s_at   | Extracellular Space | 1.25                              | -5.34  |
| apolipoprotein E                                         | <i>APOE</i>    | 203382_s_at   | Extracellular Space | -5.12                             | -7.97  |
| complement component 3a receptor 1                       | <i>C3AR1</i>   | 209906_at     | Plasma Membrane     | 2.31                              | 4.04   |
| cytochrome P450, family 2, subfamily E, polypeptide 1    | <i>CYP2E1</i>  | 209976_s_at   | Cytoplasm           | 5.85                              | -7.23  |
| cytochrome P450, family 4, subfamily A, polypeptide 11   | <i>CYP4A11</i> | 211231_x_at   | Cytoplasm           | -4.69                             | -6.86  |
| fibroblast growth factor receptor 2                      | <i>FGFR2</i>   | 211400_at     | Plasma Membrane     | 4.66                              | -15.37 |
| hemopexin                                                | <i>HPX</i>     | 39763_at      | Extracellular Space | -4.06                             | 4.08   |
| huntingtin                                               | <i>HTT</i>     | 202390_s_at   | Cytoplasm           | -1.25                             | 7.11   |
| insulin receptor                                         | <i>INSR</i>    | 226450_at     | Plasma Membrane     | -3.58                             | 3.41   |
| low density lipoprotein receptor                         | <i>LDLR</i>    | 217103_at     | Plasma Membrane     | -21.51                            | -11.90 |
| microtubule-associated protein tau                       | <i>MAPT</i>    | 203930_s_at   | Plasma Membrane     | -8.08                             | -3.53  |
| NADPH oxidase 4                                          | <i>NOX4</i>    | 236843_at     | Cytoplasm           | -7.65                             | -6.11  |
| paraoxonase 1                                            | <i>PON1</i>    | 206344_at     | Extracellular Space | -2.27                             | 3.33   |
| peroxiredoxin 3                                          | <i>PRDX3</i>   | 209766_at     | Cytoplasm           | 1.85                              | -9.27  |
| protein kinase, AMP-activated, alpha 2 catalytic subunit | <i>PRKAA2</i>  | 238441_at     | Cytoplasm           | 11.52                             | 22.26  |
| presenilin 1                                             | <i>PSEN1</i>   | 1559206_at    | Plasma Membrane     | -2.64                             | 9.57   |
| prostaglandin E receptor 3 (subtype EP3)                 | <i>PTGER3</i>  | 210375_at     | Plasma Membrane     | -17.23                            | 27.73  |
| prostaglandin E receptor 4 (subtype EP4)                 | <i>PTGER4</i>  | 204896_s_at   | Plasma Membrane     | 1.21                              | 8.43   |
| superoxide dismutase 2, mitochondrial                    | <i>SOD2</i>    | 215078_at     | Cytoplasm           | -2.25                             | -7.44  |
| tocopherol (alpha) transfer protein                      | <i>TTPA</i>    | 210614_at     | transporter         | 2.02                              | 3.71   |

<sup>a</sup>Normalized ratio of fold change of signal at 6 and 12 h of storage to corresponding signal of control group.



**Supplementary Table 4.** RT-PCR primer sequences for genes encoding ROS related genes

| Gene Name                                                           | Symbol         | NCBI Ref. seq  | Direction | Primer sequence (5'-3')              |
|---------------------------------------------------------------------|----------------|----------------|-----------|--------------------------------------|
| v-akt murine thymoma viral oncogene homolog 2                       | <i>AKT2</i>    | AA769075       | Forward   | GGT ACT TCC TGC TGA AGA GC           |
|                                                                     |                |                | Reverse   | AAC GGG TGC CTG GTG TTC TG           |
| mitogen-activated protein kinase kinase kinase 2                    | <i>MAP3K2</i>  | AF239798.1     | Forward   | CCT TCA GTT CCC CAG ACC AG           |
|                                                                     |                |                | Reverse   | ATT CCG GGC AAC CTG GTG              |
| phosphoinositide-3-kinase, regulatory subunit 1 (alpha)             | <i>PIK3R1</i>  | NM_001242466.1 | Forward   | CGA CAG ATG GAC AGT GTG AC           |
|                                                                     |                |                | Reverse   | CCA AGA GCT ACT AAG GAC CC           |
| forkhead box O3                                                     | <i>FOXO3</i>   | NM_201559.2    | Forward   | CAT GCG GGT CCA GAA TGA GG           |
|                                                                     |                |                | Reverse   | CTA GAG CTC CGC TGC ATG AG           |
| KH domain containing, RNA binding, signal transduction associated 1 | <i>KHDRBS1</i> | NM_006559.1    | Forward   | CAG CCT CGG TCA AGA TGG AG           |
|                                                                     |                |                | Reverse   | CAC GTC CAC GAG AGG GTT CA           |
| Homo sapiens glyceraldehyde 3-phosphate dehydrogenase               | <i>GAPDH</i>   | NM_002046      | Forward   | CAT GAC CAC AGT CCA TGCCAT<br>CAC T  |
|                                                                     |                |                | Reverse   | TGA GGT CCA CCA CCC TGT TGC<br>TGT A |

Ref. seq.: Reference sequence

**Supplementary Table 5.** qPCR primer sequences for genes encoding ROS related genes

| Gene Name                                                           | Symbol         | NCBI Ref. seq  | Direction | Primer sequence (5'-3')       |
|---------------------------------------------------------------------|----------------|----------------|-----------|-------------------------------|
| v-akt murine thymoma viral oncogene homolog 2                       | <i>AKT2</i>    | AA769075       | Forward   | CTG AAT GAG AGG GAG TGG TTC   |
|                                                                     |                |                | Reverse   | TGG GTC TGT ACT GGA ATT TGG   |
| mitogen-activated protein kinase kinase kinase 2                    | <i>MAP3K2</i>  | AF239798.1     | Forward   | CAG TGG AGA AGG CTA TGG AAG   |
|                                                                     |                |                | Reverse   | GGC TGA GTG GCG ATT TTA AAG   |
| phosphoinositide-3-kinase, regulatory subunit 1 (alpha)             | <i>PIK3R1</i>  | NM_001242466.1 | Forward   | GTC ATA CTG TCA CTG CTC TGG   |
|                                                                     |                |                | Reverse   | TGA ATG AGA AGG ACT GCC AC    |
| forkhead box O3                                                     | <i>FOXO3</i>   | NM_201559.2    | Forward   | ATA GGC AAA AGG AGT GGA GC    |
|                                                                     |                |                | Reverse   | CAT TAG CTG AGG ACA CTG ACA G |
| KH domain containing, RNA binding, signal transduction associated 1 | <i>KHDRBS1</i> | NM_006559.1    | Forward   | CGA GTG CTG ATA CCT GTC AAG   |
|                                                                     |                |                | Reverse   | GAG CCC TTT CCC AAT ACA GAG   |
| Homo sapiens glyceraldehyde 3-phosphate dehydrogenase               | <i>GAPDH</i>   | NM_002046      | Forward   | GAA GAC TGT GGA TGG CCC       |
|                                                                     |                |                | Reverse   | CCA TGC CAG TGA GCT TCC       |

Ref. seq.: Reference sequence

**Supplementary Table 6.** qPCR primer sequences for genes encoding lipid peroxidation related genes

| Gene Name                                                             | Symbol         | NCBI Ref. seq | Direction | Primer sequence (5'-3')        |
|-----------------------------------------------------------------------|----------------|---------------|-----------|--------------------------------|
| Homo sapiens superoxide dismutase 2                                   | <i>SOD2</i>    | BC016934.1    | Forward   | TGA GCC ACA TTC CGT TAC AC     |
|                                                                       |                |               | Reverse   | GAC CAA ACA TTT CCC CAA AGC    |
| Homo sapiens cytochrome P450, family 4, subfamily A, polypeptide 11   | <i>CYP4A11</i> | BC041158.1    | Forward   | TGT TTG ACC CTT TCC GTT TTG    |
|                                                                       |                |               | Reverse   | GAC TTC CCT CAT TCC TCT ATT CG |
| Homo sapiens tocopherol (alpha) transfer protein                      | <i>TTPA</i>    | BC058000.1    | Forward   | AGG TAG AAA CTC AGC GGA ATG    |
|                                                                       |                |               | Reverse   | GGC TAC GGA TGG AGT GAT TTG    |
| Homo sapiens prostaglandin E receptor 4 (subtype EP4)                 | <i>PTGER4</i>  | BC101534.1    | Forward   | ATC TTA CTC ATT GCC ACC TCC    |
|                                                                       |                |               | Reverse   | TGA CTT CTC GCT CCA AAC TTG    |
| Homo sapiens protein kinase, AMP-activated, alpha 2 catalytic subunit | <i>PRKAA2</i>  | BC069823.1    | Forward   | TGT CTT CAG TTT CAC CTC GC     |
|                                                                       |                |               | Reverse   | AGA CAG ATC AAC GGG CTA AAG    |
| Homo sapiens glyceraldehyde 3-phosphate dehydrogenase                 | <i>GAPDH</i>   | NM_002046     | Forward   | GAA GAC TGT GGA TGG CCC        |
|                                                                       |                |               | Reverse   | CCA TGC CAG TGA GCT TCC        |

Ref. seq.: Reference sequence

**Supplementary Table 7.** RT-PCR primer sequences for genes encoding adipocyte specific marker genes

| Gene Name                                                     | Symbol                         | NCBI Ref. seq  | Direction | Primer sequence (5'-3')       |
|---------------------------------------------------------------|--------------------------------|----------------|-----------|-------------------------------|
| Homo sapiens peroxisome proliferator activated receptor gamma | <i>PPAR<math>\gamma</math></i> | NM_015869.4    | Forward   | TGT TAT GGG TGA AAC TCT GGG   |
|                                                               |                                |                | Reverse   | GAT ATC AAA GGA GTG GGA GTG G |
| Homo sapiens complement factor D                              | <i>Adipsin</i>                 | NM_001317335.1 | Forward   | GGT CAC CCA AGC AAC AAA GT    |
|                                                               |                                |                | Reverse   | CTC CTG CGT TCA AGT CAT C     |
| Homo sapiens glyceraldehyde 3-phosphate dehydrogenase         | <i>GAPDH</i>                   | NM_002046      | Forward   | GAA GAC TGT GGA TGG CCC       |
|                                                               |                                |                | Reverse   | CCA TGC CAG TGA GCT TCC       |

Ref. seq.: Reference sequence

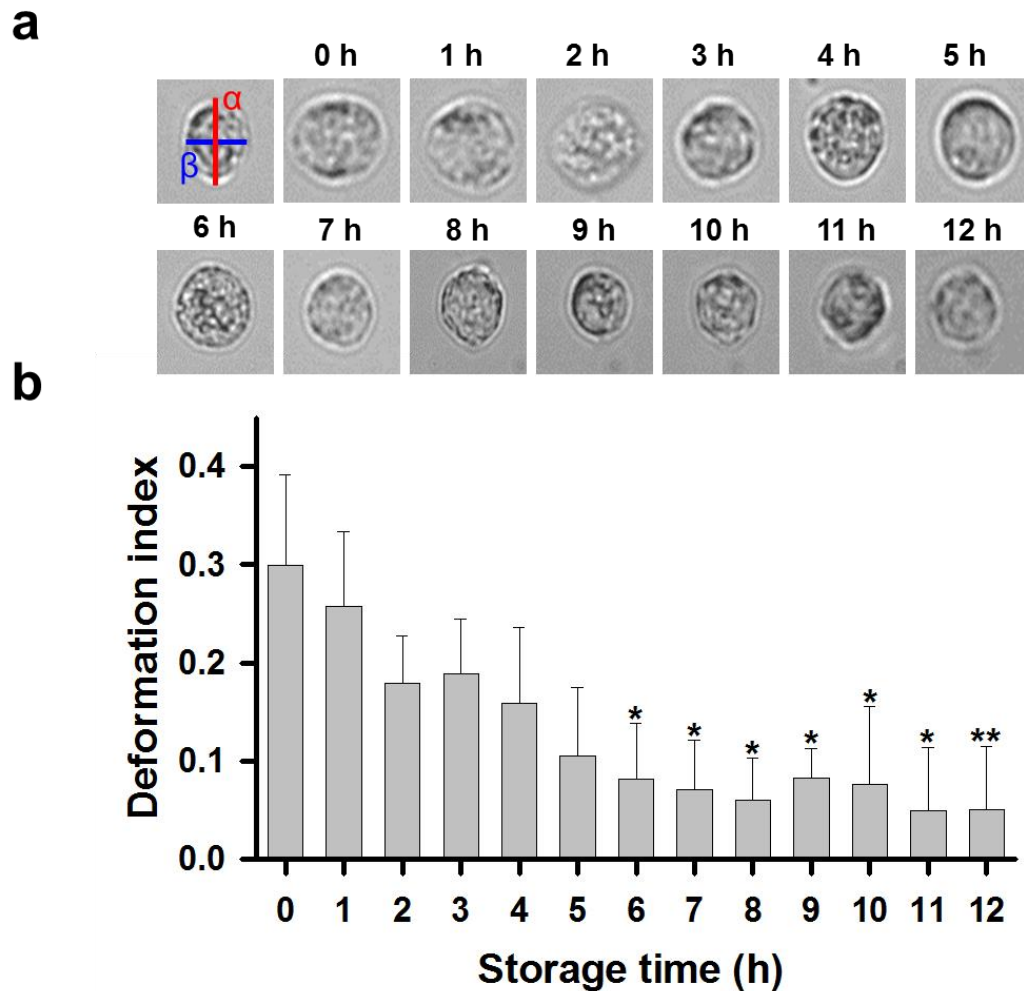

**Supplementary Figure 1. Changes in deformability of hBM-MSCs stored in PBS.** (a) Representative images for measuring deformation index of cells. Alpha; longest length of cell, beta; shortest length of cell. (b) Hourly changes in deformability in stored hBM-MSCs. Data are represented as the mean  $\pm$  SD. \*P < 0.05 vs. 0 h (control), \*\*P < 0.01 vs. 0 h (control).

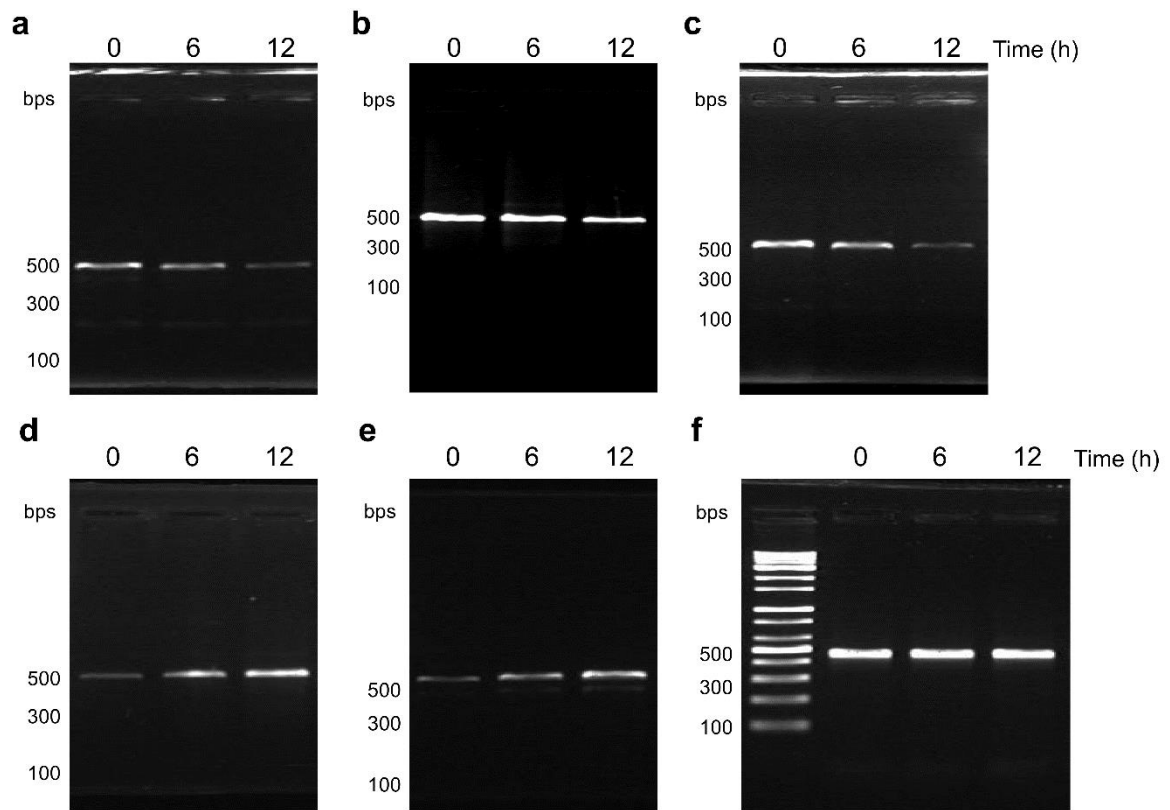

**Supplementary Figure 2.** Original gel images of RT-PCR for the ROS-related genes *AKT2* (a), *MAP3K2* (b), *PIK3R1* (c), *FOXO3* (d), *KHDRBS1* (e), and *GAPDH* (f) for Figure 2b. hBM-MSCs were stored in PBS for 6 and 12 h, and total RNA was reverse transcribed into cDNA. RT-PCR was performed using gene-specific primers.

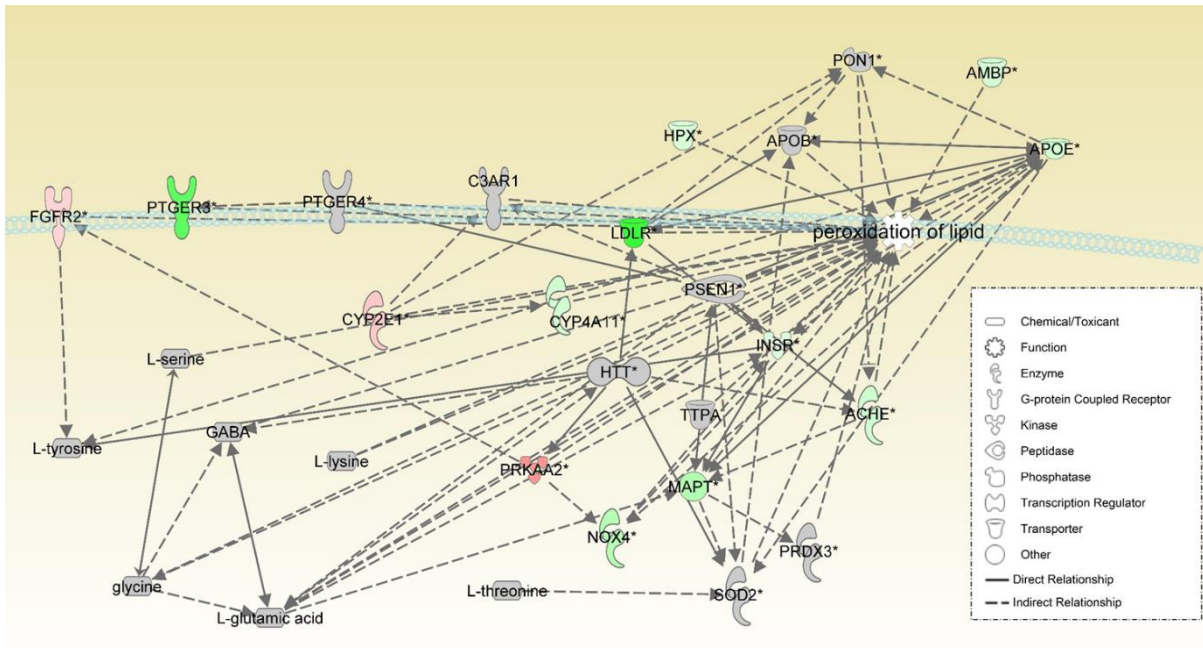

**Supplementary Figure 3. Bioinformatics analysis of microarray and amino acid profiles in hBM-MSCs, stored in PBS for 6 h.** Lipid peroxidation related gene and amino acid network were constructed algorithmically by IPA. Red and green areas indicate up and downregulated genes, respectively. Differentially expressed genes obtained from microarray data (genes with > 3-fold change) are shown.

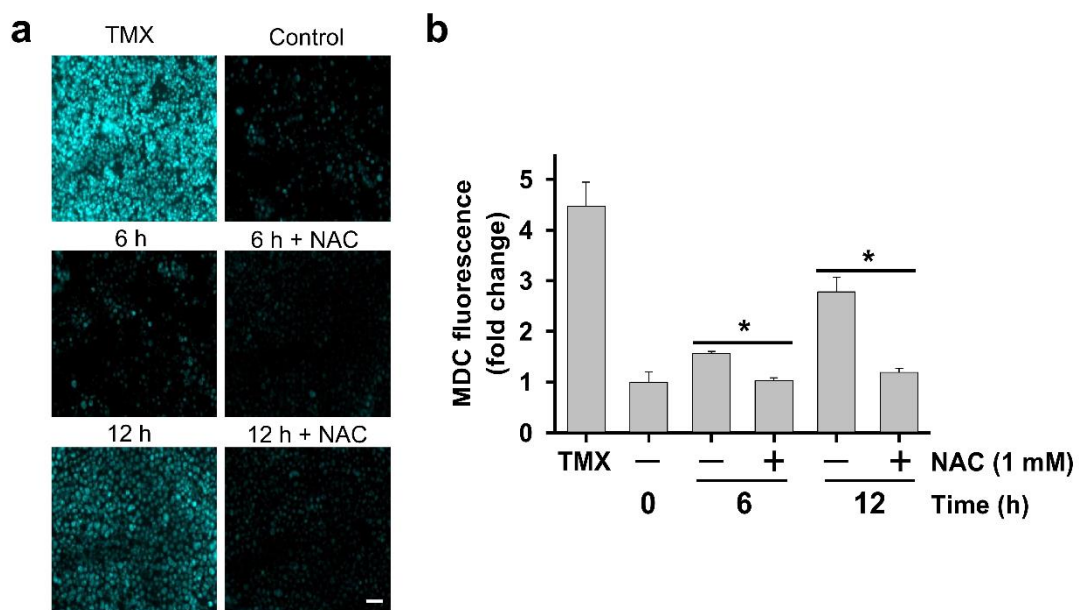

**Supplementary Figure 4. Analysis of autophagy induction in stored hBM-MSCs.** (a) Representative images for MDC staining of incubated hBM-MSCs. Tamoxifen (TMX) was used as positive control for autophagy. Scale bar = 100  $\mu$ m. (b) Evaluation of autophagy induction in 6 h or 12 h-incubation in hBM-MSCs using MDC and fluorescence microplate reader at 335/512 nm (excitation/emission). The intensities are normalized with 0 h control. Data are represented as the mean  $\pm$  SD of three independent experiments. \* $P < 0.05$  vs. 0 h (control).



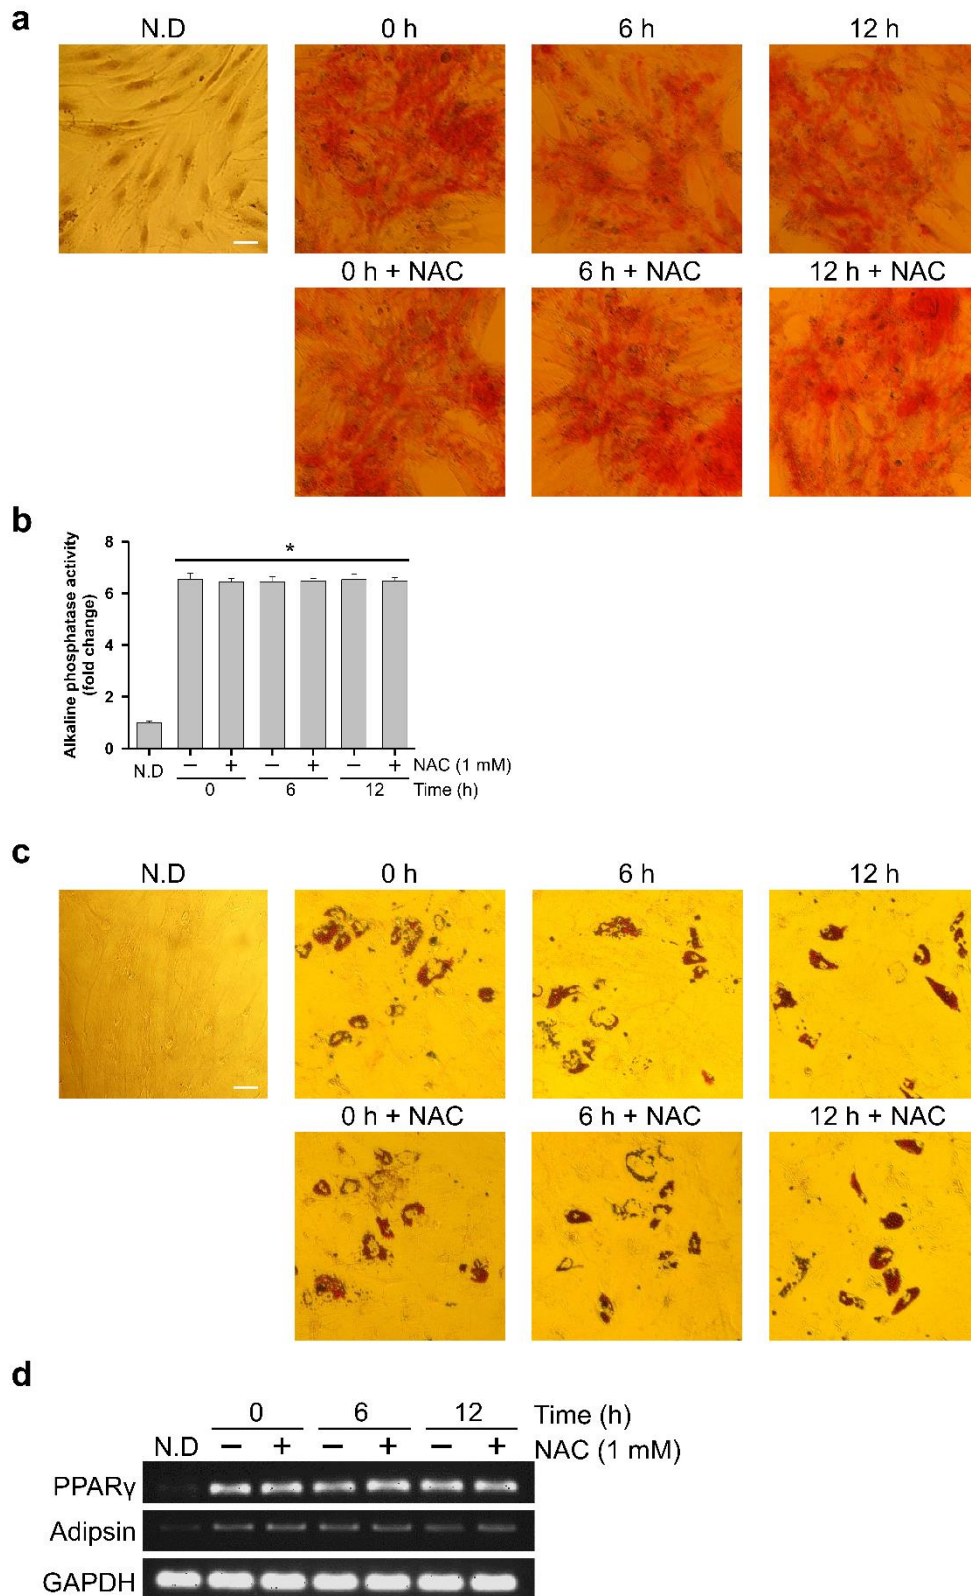

**Supplementary Figure 5. Evaluation of osteogenic and adipogenic potentials in stored hBM-MSCs.** (a) Images of mineral deposits in the osteogenic differentiated hBM-MSCs after storage stained with Alizarin Red S. The mineralization is stained as red. (b) The activity of

alkaline phosphatase was estimated after differentiation. (c) Images of lipid deposits in the adipogenic differentiated hBM-MSCs after storage stained with Oil Red O. Lipid droplets of adipocyte were stained as red. (d) Semi-quantitative RT-PCR detection of adipocyte specific marker genes (*PPAR $\gamma$*  and *Adipsin*) in hBM-MSCs after differentiation. Glyceraldehyde 3-phosphate dehydrogenase (*GAPDH*) served as an internal control. Bands were cropped from Supplementary Fig. 6. Scale bar = 20  $\mu$ m. N.D, nondifferentiated control. Data represent mean  $\pm$  SD of three independent experiments. \*P < 0.05

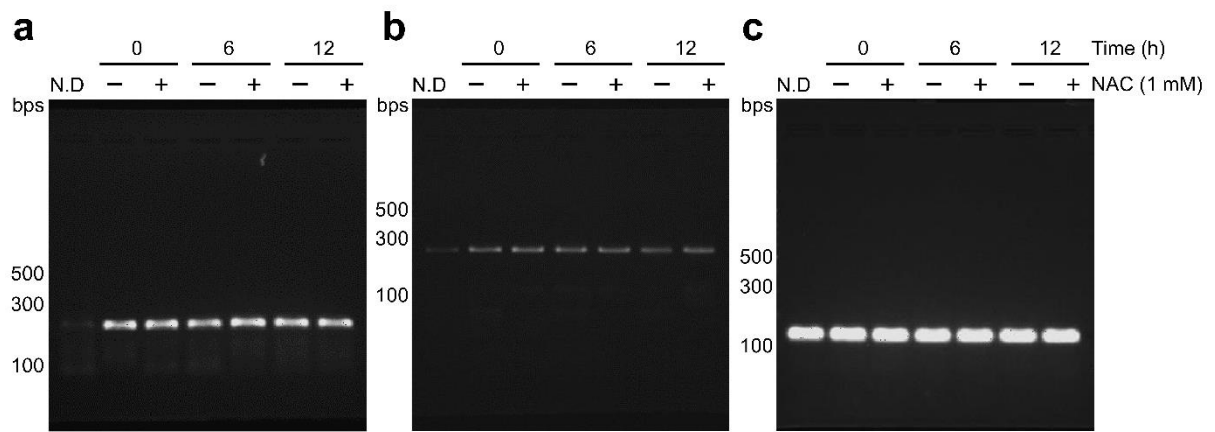

**Supplementary Figure 6.** Original gel images of RT-PCR for the adipocyte specific marker genes *PPAR $\gamma$*  (a), *Adipsin* (b), and *GAPDH* (c) for Supplementary Figure 5d. hBM-MSCs were stored in PBS for 6 and 12 h, and then were adipogenic differentiated for 2 weeks. Total RNA was reverse transcribed into cDNA. RT-PCR was performed using gene-specific primers. N.D, nondifferentiated control.

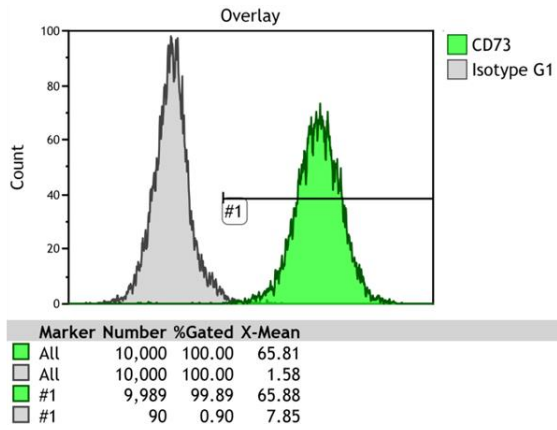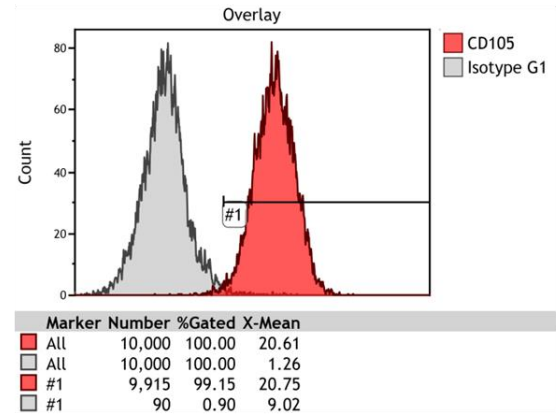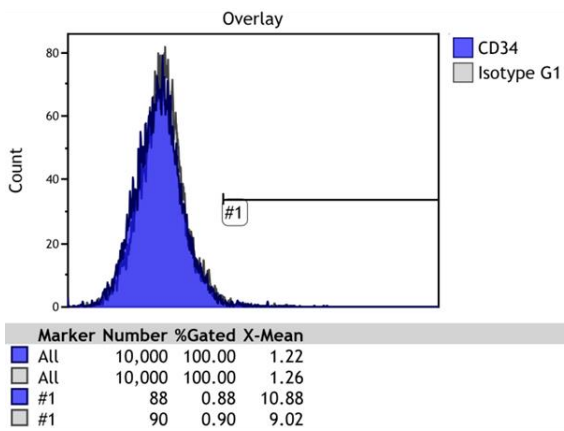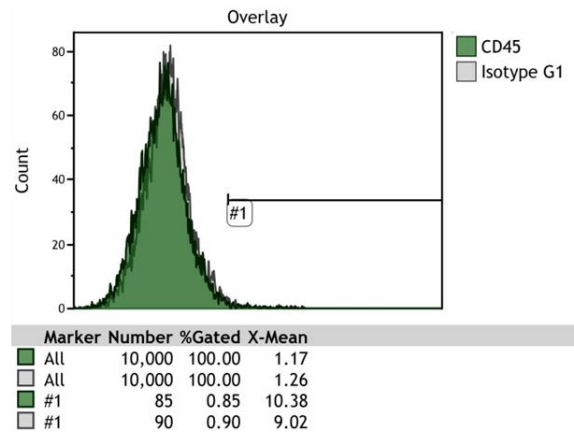

**Supplementary Figure 7. Characteristics of hBM-MSCs.** Flow cytometric analysis of hBM-MSCs surface markers, CD73 and CD105 (upper panel). Negative markers of hBM-MSCs, CD34 and CD45 (lower panel).
